# Supplementary material
Source: PubMed Central journal article supplement (PMC9450338)

| Study or Subgroup                                                                                       | Vitamin D |            | Control |            | Weight        | Risk Ratio<br>M-H, Random, 95% CI | Year |
|---------------------------------------------------------------------------------------------------------|-----------|------------|---------|------------|---------------|-----------------------------------|------|
|                                                                                                         | Events    | Total      | Events  | Total      |               |                                   |      |
| <b>2.6.1 Vit D deficient &lt;30 ng/ml</b>                                                               |           |            |         |            |               |                                   |      |
| Amrein 2014                                                                                             | 54        | 237        | 63      | 238        | 89.0%         | 0.86 [0.63, 1.18]                 | 2014 |
| Ingels 2020                                                                                             | 1         | 11         | 2       | 13         | 1.7%          | 0.59 [0.06, 5.68]                 | 2020 |
| <b>Subtotal (95% CI)</b>                                                                                |           | <b>248</b> |         | <b>251</b> | <b>90.7%</b>  | <b>0.85 [0.63, 1.17]</b>          |      |
| Total events                                                                                            | 55        |            | 65      |            |               |                                   |      |
| Heterogeneity: Tau <sup>2</sup> = 0.00; Chi <sup>2</sup> = 0.10, df = 1 (P = 0.75); I <sup>2</sup> = 0% |           |            |         |            |               |                                   |      |
| Test for overall effect: Z = 0.98 (P = 0.32)                                                            |           |            |         |            |               |                                   |      |
| <b>2.6.2 Mixed baseline Vit D level</b>                                                                 |           |            |         |            |               |                                   |      |
| Leaf 2014                                                                                               | 7         | 36         | 6       | 31         | 9.3%          | 1.00 [0.38, 2.67]                 | 2014 |
| <b>Subtotal (95% CI)</b>                                                                                |           | <b>36</b>  |         | <b>31</b>  | <b>9.3%</b>   | <b>1.00 [0.38, 2.67]</b>          |      |
| Total events                                                                                            | 7         |            | 6       |            |               |                                   |      |
| Heterogeneity: Not applicable                                                                           |           |            |         |            |               |                                   |      |
| Test for overall effect: Z = 0.01 (P = 0.99)                                                            |           |            |         |            |               |                                   |      |
| <b>Total (95% CI)</b>                                                                                   |           | <b>284</b> |         | <b>282</b> | <b>100.0%</b> | <b>0.87 [0.64, 1.17]</b>          |      |
| Total events                                                                                            | 62        |            | 71      |            |               |                                   |      |
| Heterogeneity: Tau <sup>2</sup> = 0.00; Chi <sup>2</sup> = 0.20, df = 2 (P = 0.91); I <sup>2</sup> = 0% |           |            |         |            |               |                                   |      |
| Test for overall effect: Z = 0.93 (P = 0.35)                                                            |           |            |         |            |               |                                   |      |
| Test for subgroup differences: Chi <sup>2</sup> = 0.10, df = 1 (P = 0.76), I <sup>2</sup> = 0%          |           |            |         |            |               |                                   |      |

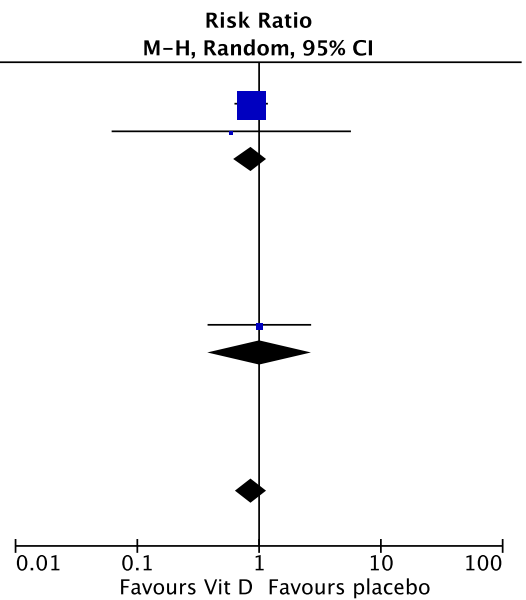

Supplement: 13054_2022_4139_MOESM4_ESM.pdf [file 13054_2022_4139_MOESM4_ESM.pdf]
