# Supplementary material
Source: PubMed Central journal article supplement (PMC9450338)

| Study or Subgroup                                                                                        | Vitamin D |            | Control |            | Weight        | Risk Ratio<br>M-H, Random, 95% CI | Year |
|----------------------------------------------------------------------------------------------------------|-----------|------------|---------|------------|---------------|-----------------------------------|------|
|                                                                                                          | Events    | Total      | Events  | Total      |               |                                   |      |
| <b>1.5.1 EN/PO</b>                                                                                       |           |            |         |            |               |                                   |      |
| Amrein 2011                                                                                              | 6         | 12         | 6       | 13         | 7.5%          | 1.08 [0.48, 2.45]                 | 2011 |
| Amrein 2014                                                                                              | 67        | 237        | 84      | 238        | 43.5%         | 0.80 [0.61, 1.04]                 | 2014 |
| Han 2016                                                                                                 | 1         | 20         | 1       | 10         | 0.8%          | 0.50 [0.03, 7.19]                 | 2016 |
| Ginde 2019                                                                                               | 92        | 538        | 72      | 539        | 40.2%         | 1.28 [0.96, 1.70]                 | 2019 |
| <b>Subtotal (95% CI)</b>                                                                                 |           | <b>807</b> |         | <b>800</b> | <b>92.0%</b>  | <b>1.01 [0.72, 1.41]</b>          |      |
| Total events                                                                                             | 166       |            | 163     |            |               |                                   |      |
| Heterogeneity: Tau <sup>2</sup> = 0.05; Chi <sup>2</sup> = 5.92, df = 3 (P = 0.12); I <sup>2</sup> = 49% |           |            |         |            |               |                                   |      |
| Test for overall effect: Z = 0.04 (P = 0.97)                                                             |           |            |         |            |               |                                   |      |
| <b>1.5.2 IV/IM</b>                                                                                       |           |            |         |            |               |                                   |      |
| Leaf 2014                                                                                                | 8         | 36         | 7       | 31         | 6.4%          | 0.98 [0.40, 2.40]                 | 2014 |
| Ingels 2020                                                                                              | 2         | 11         | 2       | 13         | 1.7%          | 1.18 [0.20, 7.06]                 | 2020 |
| <b>Subtotal (95% CI)</b>                                                                                 |           | <b>47</b>  |         | <b>44</b>  | <b>8.0%</b>   | <b>1.02 [0.46, 2.27]</b>          |      |
| Total events                                                                                             | 10        |            | 9       |            |               |                                   |      |
| Heterogeneity: Tau <sup>2</sup> = 0.00; Chi <sup>2</sup> = 0.03, df = 1 (P = 0.86); I <sup>2</sup> = 0%  |           |            |         |            |               |                                   |      |
| Test for overall effect: Z = 0.05 (P = 0.96)                                                             |           |            |         |            |               |                                   |      |
| <b>Total (95% CI)</b>                                                                                    |           | <b>854</b> |         | <b>844</b> | <b>100.0%</b> | <b>1.01 [0.80, 1.27]</b>          |      |
| Total events                                                                                             | 176       |            | 172     |            |               |                                   |      |
| Heterogeneity: Tau <sup>2</sup> = 0.01; Chi <sup>2</sup> = 5.96, df = 5 (P = 0.31); I <sup>2</sup> = 16% |           |            |         |            |               |                                   |      |
| Test for overall effect: Z = 0.05 (P = 0.96)                                                             |           |            |         |            |               |                                   |      |
| Test for subgroup differences: Chi <sup>2</sup> = 0.00, df = 1 (P = 0.97), I <sup>2</sup> = 0%           |           |            |         |            |               |                                   |      |

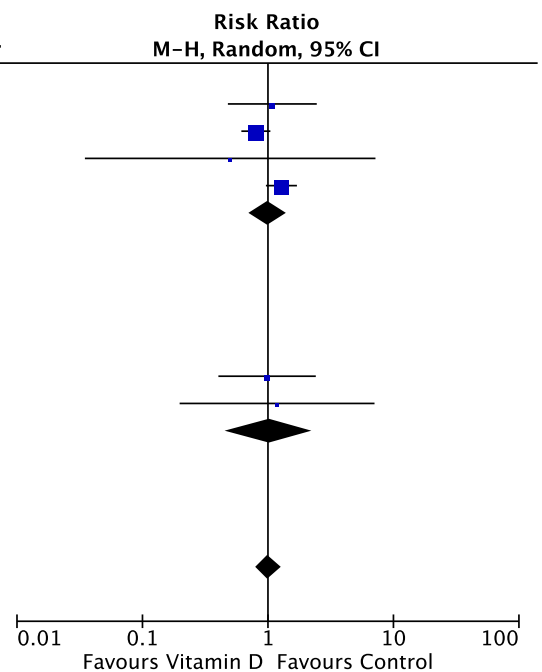

Supplement: 13054_2022_4139_MOESM6_ESM.pdf [file 13054_2022_4139_MOESM6_ESM.pdf]
