# Supplementary material
Source: PubMed Central journal article supplement (PMC9450338)

| Study or Subgroup                         | Vitamin D |             | Control |             | Weight       | Risk Ratio<br>M-H, Random, 95% CI | Year |
|-------------------------------------------|-----------|-------------|---------|-------------|--------------|-----------------------------------|------|
|                                           | Events    | Total       | Events  | Total       |              |                                   |      |
| <b>2.2.1 Vit D deficient &lt;30 ng/ml</b> |           |             |         |             |              |                                   |      |
| Amrein 2011                               | 6         | 12          | 6       | 13          | 5.9%         | 1.08 [0.48, 2.45]                 | 2011 |
| Amrein 2014                               | 52        | 237         | 68      | 238         | 16.1%        | 0.77 [0.56, 1.05]                 | 2014 |
| Ding 2017                                 | 3         | 29          | 5       | 28          | 2.6%         | 0.58 [0.15, 2.20]                 | 2017 |
| Miroliaee 2018                            | 5         | 24          | 11      | 22          | 5.2%         | 0.42 [0.17, 1.01]                 | 2018 |
| Ginde 2019                                | 92        | 531         | 69      | 528         | 16.9%        | 1.33 [0.99, 1.77]                 | 2019 |
| Hasanloei 2019                            | 3         | 48          | 5       | 24          | 2.6%         | 0.30 [0.08, 1.15]                 | 2019 |
| Yousefian 2019                            | 8         | 33          | 6       | 33          | 4.8%         | 1.33 [0.52, 3.42]                 | 2019 |
| Miri 2019                                 | 8         | 22          | 11      | 18          | 7.9%         | 0.60 [0.31, 1.16]                 | 2019 |
| Karsy 2020                                | 11        | 134         | 13      | 133         | 6.5%         | 0.84 [0.39, 1.81]                 | 2020 |
| Ingels 2020                               | 2         | 11          | 2       | 13          | 1.6%         | 1.18 [0.20, 7.06]                 | 2020 |
| Sharma 2020                               | 2         | 20          | 3       | 15          | 1.8%         | 0.50 [0.10, 2.63]                 | 2020 |
| Sistanizad 2021                           | 5         | 16          | 12      | 14          | 6.6%         | 0.36 [0.17, 0.78]                 | 2021 |
| <b>Subtotal (95% CI)</b>                  |           | <b>1117</b> |         | <b>1079</b> | <b>78.5%</b> | <b>0.75 [0.56, 1.02]</b>          |      |

Total events 197 211  
Heterogeneity:  $\tau^2 = 0.11$ ;  $\chi^2 = 22.29$ ,  $df = 11$  ( $P = 0.02$ );  $I^2 = 51\%$   
Test for overall effect:  $Z = 1.84$  ( $P = 0.07$ )

**2.2.2 Mixed baseline Vit D level**

|                          |    |            |    |            |              |                          |      |
|--------------------------|----|------------|----|------------|--------------|--------------------------|------|
| Leaf 2014                | 6  | 36         | 7  | 31         | 4.5%         | 0.74 [0.28, 1.96]        | 2014 |
| Quraishi 2015            | 5  | 20         | 3  | 10         | 3.1%         | 0.83 [0.25, 2.80]        | 2015 |
| Han 2016                 | 1  | 20         | 1  | 10         | 0.7%         | 0.50 [0.03, 7.19]        | 2016 |
| Bhattacharyya 2021       | 23 | 63         | 30 | 63         | 13.1%        | 0.77 [0.51, 1.16]        | 2021 |
| <b>Subtotal (95% CI)</b> |    | <b>139</b> |    | <b>114</b> | <b>21.5%</b> | <b>0.76 [0.53, 1.09]</b> |      |

Total events 35 41  
Heterogeneity:  $\tau^2 = 0.00$ ;  $\chi^2 = 0.12$ ,  $df = 3$  ( $P = 0.99$ );  $I^2 = 0\%$   
Test for overall effect:  $Z = 1.47$  ( $P = 0.14$ )

**Total (95% CI)** 1256 1193 100.0% 0.77 [0.61, 0.97]

Total events 232 252  
Heterogeneity:  $\tau^2 = 0.06$ ;  $\chi^2 = 22.90$ ,  $df = 15$  ( $P = 0.09$ );  $I^2 = 35\%$   
Test for overall effect:  $Z = 2.18$  ( $P = 0.03$ )  
Test for subgroup differences:  $\chi^2 = 0.00$ ,  $df = 1$  ( $P = 0.96$ ),  $I^2 = 0\%$

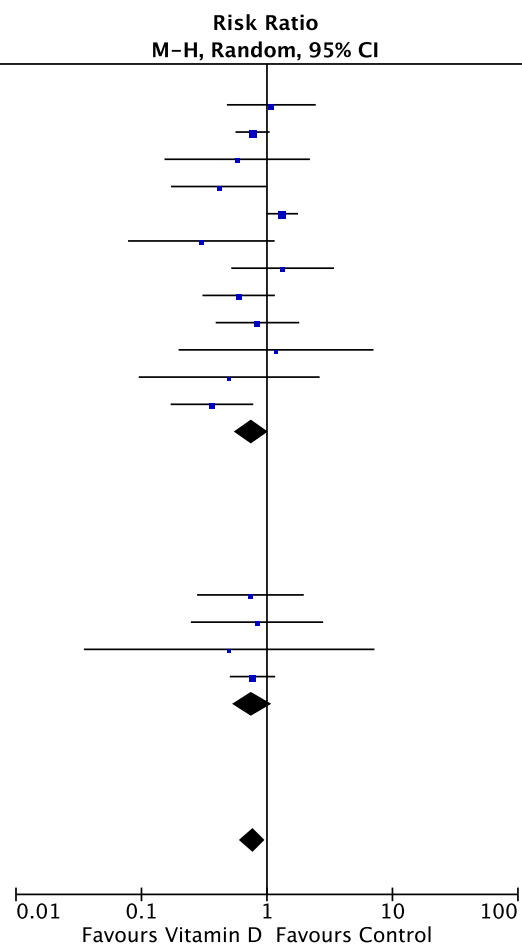

Supplement: 13054_2022_4139_MOESM9_ESM.pdf [file 13054_2022_4139_MOESM9_ESM.pdf]
