# Supplementary material
Source: PubMed Central journal article supplement (PMC9450338)

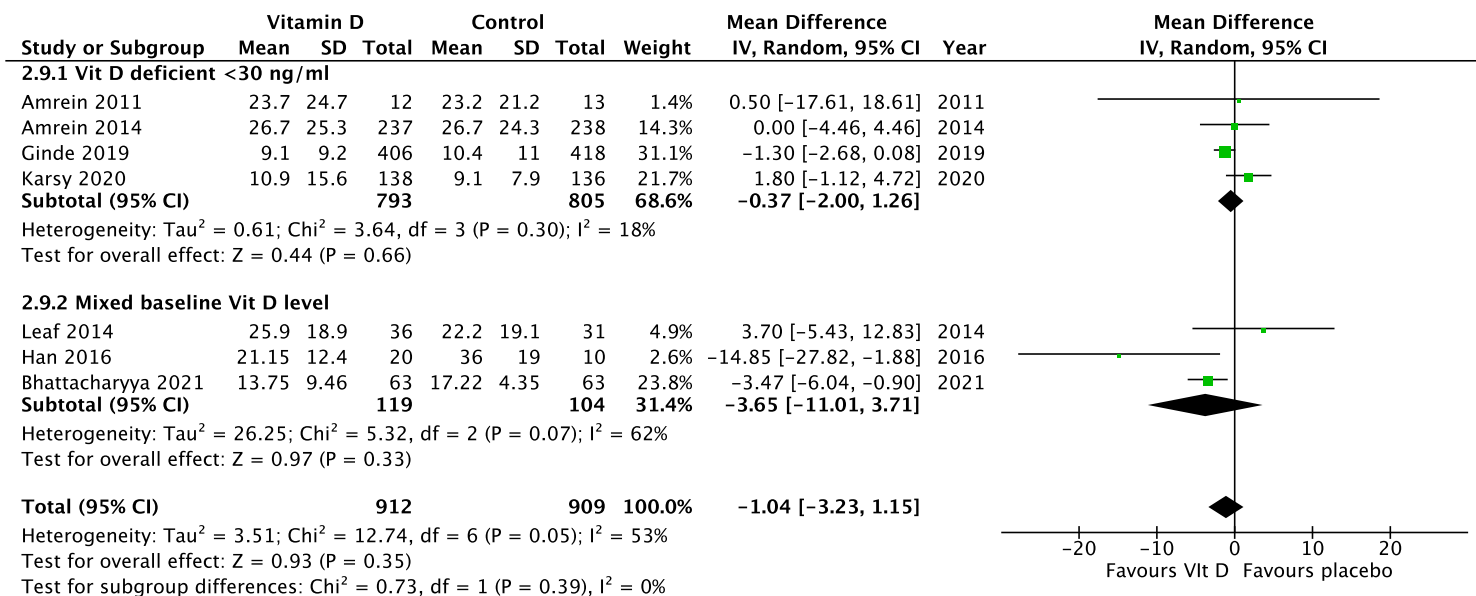

Supplement: 13054_2022_4139_MOESM11_ESM.pdf [file 13054_2022_4139_MOESM11_ESM.pdf]
